# Supplementary material
Source: PubMed Central journal article supplement (PMC6740178)
Supplement: ao9b02107_si_001.pdf [file ao9b02107_si_001.pdf]

## Supporting Information

A modular vector toolkit with a tailored set of  
thermosensors to regulate gene expression in  
*Thermus thermophilus*.

*Carlos Verdú, Esther Sanchez, Carmen Ortega, Aurelio Hidalgo, José Berenguer\*,  
Mario Mencía\*.*

AUTHOR ADDRESS. Centro de Biología Molecular Severo Ochoa, Universidad  
Autónoma de Madrid – Consejo Superior de Investigaciones Científicas, 28049 Madrid,  
Spain

**Table S1. Strain list**

| Strain                                        | Genotype                                                                                                                                        | Phenotype/use             |
|-----------------------------------------------|-------------------------------------------------------------------------------------------------------------------------------------------------|---------------------------|
| <i>E. coli</i> DH5 $\alpha$                   | F <sup>-</sup> <i>endA1 hsdR17 supE44 thi-1 recA1 gyrA96 relA1</i><br>$\Delta$ ( <i>argF-lacZYA</i> )U169<br>$\Phi$ 80d <i>lac</i> $\Delta$ M15 | Cloning<br>Promoter assay |
| <i>Thermus thermophilus</i> HB27              | ATCC BAA-163/DSM7039                                                                                                                            | Wild type                 |
| <i>Thermus thermophilus</i> HB27 $\Delta$ Ago | Deletion of <i>argonaute</i> <sup>1</sup>                                                                                                       | Enhanced competence       |

**Table S2. Plasmid list**

| Plasmid       | Description                                                                      | Use                                         | Reference    |
|---------------|----------------------------------------------------------------------------------|---------------------------------------------|--------------|
| pEM2S (pMK18) | plasmid with the Tth minimal replication origin from pMY1                        | Source of replication origin                | <sup>2</sup> |
| pMKnqosIFP    | pMK derivative with IFP expression driven by Pnqo                                | IFP expression test                         | <sup>3</sup> |
| pTT8          | Endogenous plasmid of Tth HB8.                                                   | Source of the pTT8 replication origin       | <sup>4</sup> |
| pSEVA1311     | pSEVA plasmid with the broad host range pBBR1 replication origin                 | Source of the pBBR1 E.c. replication origin | <sup>5</sup> |
| pMoTK110      | pMY Tth origin, Kanamycin, pUC <i>E.coli</i> origin, Pnqo driving IFP gene (NQO) | Basis for pMoT series                       | This work    |
| pMoTK100      | pMoTK110 with linker A cloned between NheI and HindIII                           | pMoTK cloning                               | This work    |

|            |                                                                                                       |                                      |           |
|------------|-------------------------------------------------------------------------------------------------------|--------------------------------------|-----------|
| pMoTK111   | pMoTK110 with linker 1 cloned between NdeI and HindIII                                                | pMoTK Pnqo library cloning           | This work |
| pMoTK112   | pMoTK110 with linker 2 cloned between NdeI and HindIII                                                | pMoTK Pnqo library cloning           | This work |
| pMoTK113   | pMoTK110 with linker 3 cloned between NdeI and HindIII                                                | pMoTK Pnqo library cloning           | This work |
| pMoTK115   | pMoTK110, with lac promoter driving IFP (LAC)                                                         | Plac test                            | This work |
| pMoTK116   | pMoTK110 cut with NheI and HindIII and filled-in and religated to eliminate Pnqo-IFP sequence (pMoTK) | ☐ Pnqo-IFP control                   | This work |
| pMoTK117   | pMoTK110 cut with NheI and EcoRI filled-in and religated to delete Pnqo                               | ☐ Pnqo control                       | This work |
| pMoTK118   | pMoTK110, with 16S rRNA promoter driving IFP (16S)                                                    | P16S test                            | This work |
| pMoTK119   | pMoTK110, with <i>Haloferax volcanii</i> promoter driving IFP (3K)                                    | 3K test                              | This work |
| pMoTK1103A | pMoTK110, with 3A variant of Pnqo driving IFP (K3A)                                                   | Pnqo 3A test                         | This work |
| pMoTB1103A | pMoTK1103A, with bleomycin resistance cassette cloned between PacI and AscI                           | pMoT with bleomycin expression test  | This work |
| pMoTH1103A | pMoTK1103A, with hygromycin resistance cassette cloned between PacI and AscI                          | pMoT with hygromycin expression test | This work |
| pMoTK2103A | pMoTK1103A, with pTT8 replication origin cloned between PstI and AatII (Ori2-3A)                      | Origin pTT8 expression test          | This work |
| pMoTK120   | pMoTK110 with nqo91 variant of Pnqo                                                                   | Pnqo91 assay                         | This work |
| pMoTK121   | pMoTK110 with nqo72 variant of Pnqo                                                                   | Pnqo72 assay                         | This work |
| pMoTK122   | pMoTK110 with nqo57 variant of Pnqo                                                                   | Pnqo57 assay                         | This work |

|          |                                                                                                                                                                |                                 |           |
|----------|----------------------------------------------------------------------------------------------------------------------------------------------------------------|---------------------------------|-----------|
| pMoTK123 | pMoTK110 with nqo33 variant of Pnqo                                                                                                                            | Pnqo33<br>assay                 | This work |
| pMoTK124 | pMoTK110 with nqo91-35 variant of Pnqo                                                                                                                         | nqo91-35<br>assay               | This work |
| pMoTK125 | pMoTK110 with nqo91 E-10 variant of Pnqo                                                                                                                       | nqo91 E-10<br>assay             | This work |
| pMoTK126 | pMoTK110 with nqo91-10 variant of Pnqo                                                                                                                         | nqo91-10<br>assay               | This work |
| pMoTK127 | pMoTK110 with nqo91-7 variant of Pnqo                                                                                                                          | nqo91-7<br>assay                | This work |
| pMoTK128 | pMoTK110 with nqo72 E-10 variant of Pnqo                                                                                                                       | nqo72 E-10<br>assay             | This work |
| pMoTK129 | pMoTK110 with nqo72 -10 variant of Pnqo                                                                                                                        | nqo72 -10<br>assay              | This work |
| pMoTK130 | pMoTK110 with nqo72-7 variant of Pnqo                                                                                                                          | nqo72-7<br>assay                | This work |
| pMoTK140 | pMoTK110 with 3Knqo72 variant of Pnqo                                                                                                                          | 3Knqo72<br>assay                | This work |
| pMoTH100 | pMoTH1103A with linker A cloned between NheI and HindIII                                                                                                       | pMoTH<br>cloning                | This work |
| pMoTH150 | pMoTH with IFP expressed cotranscriptionally with the hygromycin resistance gene. DF, direct fusion, control construct without thermosensor. See Sequence File | DF construct<br>IFP assay       | This work |
| pMoTH151 | pMoTH150 with polyA stretch cloned between XbaI and NdeI                                                                                                       | polyA<br>construct IFP<br>assay | This work |
| pMoTH152 | pMoTH150 with thermosensor TS0 cloned between XbaI and NdeI                                                                                                    | thermosen-<br>sor TS0<br>assay  | This work |
| pMoTH153 | pMoTH150 with thermosensor TS10 cloned between XbaI and NdeI                                                                                                   | thermosen-<br>sor TS10<br>assay | This work |
| pMoTH154 | pMoTH150 with thermosensor TS8 cloned between XbaI and NdeI                                                                                                    | thermosen-<br>sor TS8<br>assay  | This work |

|          |                                                             |                        |           |
|----------|-------------------------------------------------------------|------------------------|-----------|
| pMoTH155 | pMoTH150 with thermosensor TSP cloned between XbaI and NdeI | thermosensor TSP assay | This work |
| pMoTH156 | pMoTH150 with thermosensor TS1 cloned between XbaI and NdeI | thermosensor TS1 assay | This work |
| pMoTH157 | pMoTH150 with thermosensor TS2 cloned between XbaI and NdeI | thermosensor TS2 assay | This work |
| pMoTH158 | pMoTH150 with thermosensor TS4 cloned between XbaI and NdeI | thermosensor TS4 assay | This work |
| pMoTH159 | pMoTH150 with thermosensor TS6 cloned between XbaI and NdeI | thermosensor TS6 assay | This work |

**Table S3. Oligonucleotides list**

| Name of oligonucleotide | Sequence                                                                     | Utilization                                                                                    |
|-------------------------|------------------------------------------------------------------------------|------------------------------------------------------------------------------------------------|
| EM2SRepAat              | TGTTGGCGACGTCCTCAGTTGACC                                                     | Primer Fw to amplify TthRep1 from pEM2S with AatII site                                        |
| EM2SRepPstRev           | AAACTGCAGGTTATACTCCCCCGGG                                                    | Primer Fw to amplify TthRep1 from pEM2S with PstI site                                         |
| PslAPacPst              | AAACTGCAGTTAATTAAGAAACCTTAAGGCCGACCG                                         | Primer Fw to amplify PslpA-kanamycin resistance cassette from pMK184 with PstI and PacI sites  |
| KatAscNheRv             | GTCGTGCTAGCTACAGGCGGCCACGTCGTGACTGGGAAAAC                                    | Primer Rev to amplify PslpA-kanamycin resistance cassette from pMK184 with AscI and NheI sites |
| ColENheHind             | CACAGCTAGCTACGAAGCTTAGCCGGAAGCATAAAG                                         | Primer Fw to amplify pUC Ec replication origin with NheI and HindIII sites                     |
| ColE1AatNot             | CTGACGTCAAGCGGCCGAGTTTACTCATATATACTTTAGA                                     | Primer Rev to amplify pUC Ec replication origin with AatII and Not sites                       |
| TermSLNheFw             | [Phos]CTAGTAAAGTTCTAACCCTGGCGGTCCCGCCCCGCCCTTTGGGGGGGGGGGGTTTTTGTCTCCCG      | Primer Fw to generate the SlpA terminator (to NheI site)                                       |
| TermSLNheRv             | [Phos]CTAGCGGGGAGAAACAAAACCCCCGCCGCCCAAGGGGGCGGGGGCGGGACCGCCAGGGGTTAGAACTTTA | Primer Rv to generate the SlpA terminator (to NheI site)                                       |
| PnqoNhe                 | AAAAGCTAGCTCCAGGGGCCTTCTTTCC                                                 | Primer Fw to amplify promoter nqo with NheI site                                               |
| PnqoEcoRv               | AAACATATGCCCTCCTTTCGTGCACGAAAGAATTCTTCTCACGAAAC                              | Primer Rv to amplify promoter nqo with sites EcoRI and NdeI                                    |
| sIFPFw                  | GGGCATATGAGCAAAGGAGAAGAA                                                     | Primer Fw to amplify sIFP gene with site NdeI                                                  |
| sIFPRv                  | CCGCAAGCTTTTATTATTGTAGAGCTC                                                  | Primer Rv to amplify sIFP gene with site HindIII                                               |

|               |                                                                         |                                                                           |
|---------------|-------------------------------------------------------------------------|---------------------------------------------------------------------------|
| NdeltoVspIpsI | CATTATTAATCCTCACACCTCCTTAAGGGT                                          | Primer Rv to amplify PlspA with site VspI                                 |
| NdeHph17      | GAGGTGTGAGGCATATGAAAAGCC                                                | Primer Fw to amplify Hph17 gene with site NdeI                            |
| EndHph17      | CATAACCTGAAGGAGGCGCCATCTCTATTCCT                                        | Primer Rv to amplify Hph17 gene with site Ascl                            |
| NdeBleo       | GGTGTGAGGCATATGGCCAAGT                                                  | Primer Fw to amplify Bleomycin resistance gene with site NdeI             |
| EndBleo       | CCCGGGGATGGCGCCCTAGATTAGTC                                              | Primer Rv to amplify Bleomycin resistance gene with site Ascl             |
| pTT8Fw        | CGCTCACCTGAGCG                                                          | Primer Fw to amplify pTT8 replication origin                              |
| pTT8PstRv     | AAAAACTGCAGGCTATGGAGGGTTCTCCCTG                                         | Primer Rv to amplify pTT8 replication origin with site PstI               |
| OripBBRFw     | ATAGGTGAAGCTTAGGCCACCCG                                                 | Primer Fw to amplify pBBR replication origin from pSEVA with HindIII site |
| OripBBRNot    | AAAGCGGCCGCCCTACGGGCTT                                                  | Primer Rv to amplify pBBR replication origin from pSEVA with Not site     |
| MKsIFPFW      | AGAAGAATTCTTTCGTGCACGAAAGGAGGGGC                                        | Primer Fw to amplify the sIFP CDS from pMKnqosIFP with EcoRI site         |
| MKsIFPRv      | TGCGGCCGCAAGCTTTTATTATTGTAG                                             | Primer Rv to amplify the sIFP CDS from pMKnqosIFP with HindIII site       |
| PlacNheFw     | GCAGCTAGCACGACAGGTTTCC                                                  | Primer Rv to amplify lac promoter from pUC18 with NheI site               |
| PlacEcoRv     | TTGTTATGAATTCTACAATCCACAC                                               | Primer Rv to amplify lac promoter from pUC18 with EcoRI site              |
| P16SFw        | AAAGCTAGCTCTACCGCGAGTTTGACTCGTGAGCGCTTCATTGAGGAGATC<br>CGCTGCCCTCGCAA   | Primer Fw to generate 16S promoter with NheI site                         |
| P16SRv        | TTTGAATTCAGAAAAGCCATGCTATCAATCCCCCTCTTTTGTCAAGGCTTG<br>CGAGGGCAGCGGATCT | Primer Rv to generate 16S promoter with EcoRI site                        |
| MoTLinkerFw   | [Phos]CTAGCAGATATCATCTAGAAAACATATGAGGTACCAGAATCACTAG<br>TGGATCCA        | Oligonucleotide Fw to generate polylinker (to sites NheI and HindIII)     |
| MoTLinkerRv   | [Phos]AGCTTGGATCCACTAGTGAATTCTGGTACCTCATATGTTTTCTAGATG<br>ATATCTGCTAG   | Oligonucleotide Rv to generate polylinker (to sites NheI and HindIII)     |
| Linker1Fw     | [Phos]TATGGTCGACAAGATATCAGGATCCATCTAGAA                                 | Oligonucleotide Fw to generate Linker1 (to sites NdeI and HindIII)        |
| Linker1Rv     | [Phos]AGCTTTCTAGATGGATCCTGATATCTTGTGACCA                                | Oligonucleotide Rv to generate Linker1 (to sites NdeI and HindIII)        |
| Linker2Fw     | [Phos]TATGGGTCGACAAGATATCAGGATCCATCTAGAA                                | Oligonucleotide Fw to generate Linker2 (to sites NdeI and HindIII)        |
| Linker2Rv     | [Phos]AGCTTTCTAGATGGATCCTGATATCTTGTGACCCA                               | Oligonucleotide Rv to generate Linker2 (to sites NdeI and HindIII)        |
| Linker3Fw     | [Phos]TATGGGGTCGACAAGATATCAGGATCCATCTAGAA                               | Oligonucleotide Fw to generate Linker3 (to sites NdeI and HindIII)        |
| Linker3Rv     | [Phos]AGCTTTCTAGATGGATCCTGATATCTTGTGACCCCA                              | Oligonucleotide Rv to generate Linker3 (to sites NdeI and HindIII)        |
| nqo91         | GTAGGCTAGCCCCCTTGC GCC                                                  | Primer Fw to generate promoter nqo91                                      |
| nqo72         | TTGCGCGCTAGCCCGGGTGAT                                                   | Primer Fw to generate promoter nqo72                                      |
| nqo57         | GGTGCTAGCATGGGCAGGAAATGA                                                | Primer Fw to generate promoter nqo57                                      |

|               |                                                                               |                                                                                 |
|---------------|-------------------------------------------------------------------------------|---------------------------------------------------------------------------------|
| nqo33         | AGGCCGGCTAGCTTTGGGGCTTTG                                                      | Primer Fw to generate promoter nqo33                                            |
| 3Knqo         | CCAACGCAGCACTAGTGACGACGCTGGGT                                                 | Primer Rv to fuse promoter 3K to nqo 72 with site SpeI                          |
| sIFP_Rv       | AAAGAATTCTTATTGTAGAGCTCATCCATGC                                               | Primer Rv to amplify sIFP gene from pMoT with site EcoRI                        |
| TS_Parental   | AAATCTAGACCTCCTTCAAAAAAGAAGGAGGATATACATATGAGCAAAGGA<br>GAAGAACTTTTCA          | Primer Fw to amplify sIFP gene adding thermosensor Parental (sites XbaI, EcoRI) |
| TS_Var_0      | AAATCTAGAACTCCTTCAAAAAAGAAGGAGGATATACATATGAGCAAAGGA<br>GAAGAACTTTTCA          | Primer Fw to amplify sIFP gene adding thermosensor ts0                          |
| TS_Var_1      | AAATCTAGACCTCCTTAAACAAAAAGTTAAGGAGGATATACATATGAGCAA<br>GGAGAACTTTTCA          | Primer Fw to amplify sIFP gene adding thermosensor ts1                          |
| TS_Var_2      | AAATCTAGACCTCCTTAGCAAAAAAGCTAAGGAGGATATACATATGAGCAA<br>AGGAGAAGAACTTTTCA      | Primer Fw to amplify sIFP gene adding thermosensor ts2                          |
| TS_Var_4      | AAATCTAGACCTCCTTACGCAAAAAAGCGTAAGGAGGATATACATATGAGC<br>AAAGGAGAAGAACTTTTCA    | Primer Fw to amplify sIFP gene adding thermosensor ts4                          |
| TS_Var_6      | AAATCTAGACCTCCTTACGCGCAAAAAAGCGCTAAGGAGGATATACATAT<br>GAGCAAAGGAGAAGAACTTTTCA | Primer Fw to amplify sIFP gene adding thermosensor ts6                          |
| TS_Var_8      | AAATCTAGACCTCCTTAAAGCAAAAAAGCTAAGGAGGATATACATATGAGC<br>AAAGGAGAAGAACTTTTCA    | Primer Fw to amplify sIFP gene adding thermosensor ts8                          |
| TS_Var_10     | AAATCTAGACCTCCTTCAAAAAAAAAAAAAAAAAAGAAGGAGGATATACATA<br>TGAGCAAAGGAGAAGAACTTT | Primer Fw to amplify sIFP gene adding thermosensor ts10                         |
| TS_Var_PolyA  | AAATCTAGAAAAAAACAAAAAGAAGGAGGATATACATATGAGCAAAGG<br>AGAAGAACTTTTCA            | Primer Fw to amplify sIFP gene adding thermosensor PA                           |
| TS_Var_ContC  | AAATCTAGAAAGGAGGATATACATATGAGCAAAGGAGAAGAACTTTTCA                             | Primer Fw to amplify sIFP gene adding thermosensor ContC                        |
| Bgal_TS8_Fw   | AAATCTAGACCTCCTTAAAGCAAAAAAGCTAAGGAGGATATACATATGTCGA<br>CCGTTTGTACTACC        | Primer Fw to amplify beta-galactosidase gene adding thermosensor ts8            |
| Bgal_EcoRI_Rv | TTTTGAATTCTCATGTCTCCTCCACACGGC                                                | Primer Rv to amplify beta-galactosidase gene with site EcoRI                    |

**Table S4. List of component sequences**

Relevant restriction sites are in italics and underlined. Relevant ATGs and thermosensors in bold.

> Tth origin of replication derived from pMY1

*GCGGCCGCTTGACGTCAGCGCAGAAGTGGTCAGCTTGCATGCCTGTTGGCATGCCTCAGTTGA  
CCCCATTGACCCTTCTCTCTGGAGGTGGTAGCTAGAGGGGAATGGTCCCACCCTGGAGCCCCA  
CCCCTTGCCAAACCCTGGGCCCGGTATAATGCCGGGCAATGGGAAGACCGGGCCCCCTGGGGG  
CCCAAGGCGGCAGGGCCGCGTGAGGACCAAAAAGAGAGGCTCCCGCTGGGAGGGAACCCAA  
ATTCCAGCAACCTTTTTCTTCGCCTAAGGTTATCCCCTCCAGCGGGAAAGGCAATAGGCGCCA  
AGGCGGCGCGGGGGAGTGCCGTCTCCGACGCGGAAACGGGAGGGGTTTATGCCCAAG  
AAGGAGTTGAAGGGAAGAGCTATAAAGAACAGCCGGAAGGACTACCGAGCGGGGCCGGG  
CCTTCCTCGAGGCCCTGGCCCGGAGGAAGCGGGGCGAGGGGCGAGGAGCTTCCGCCCTCTAC  
CTGAAGCTCCTGGAGGGGGCCGCGCCCCCGGAGAAGGGGGTCCATGAGCCCCGCCCCGAGG  
AGGCGCCTCCCCGGAGGACCTCCGCGGAAGCTCCGGGAGGCGCCGCTTCCCCGGCCCTC  
CCCAACCGACAGGAGCTCTCCGCCTCCCCGCCCCCGCCCGAGATGAGGCGGGACGCCTGGAG  
CCTCGCCGACCGCCTCCTGGAGGAGGGGGAGCGGCGGGGCACCCTGCCAGGGCTTTCCGAG  
CGGGAGCGGAGGGTGTACCGGACCCTCCTCGCCCTGGGCCTCGAGGCTTGGCCCGGAGGCT  
GGGCCCGGGGAGGCCCTGCCAGGAACCTGTCCAGGTCTCCTTCTCGCCGTGAACGACG*

CCCTGGCCGTGGCCCTGGGAATCCCCCGGCCTCCCTCTACCGGGTCTGGCCTCCCTGGAGG  
CCAAGGGGCTCATCCGCCGGAGGGCTGGCGCACCCCGGCCACCCTCAAGGGCCGGACGGG  
GGTCTACGCCGGCGGGACCCTCTACGCCGTGCGCCTGCCCCACCGGGAGGCCCGCCCCGCC  
TGGACCCGGAGGACTTCCGCCACCCCTGGCGGGACCTGGAGGGGGACGCCCGTCAGGGGCG  
CACCGCCTGGAGCTTGAGAGAGTCATATACAAGTCCTCCTAAGGAGGACTCCGGGGTCTCCA  
GCTCCTCCTTCGGTTTTCGTTATCCCCTGGCGAAGCCGAAACTCCGTTAGCTTTAGACTCTCTCA  
CCGCCCTCTCCGGGCCCGCCCCGCCGAGCGCCGGGCCCTGGTGGAGGCCCTCGCCCTCTCCC  
TGGCCCCGGGAGTTCCGGGATCGCGGGAGCGTGCGCTTCTACGCCTGGGTCTCTGGAACGCC  
CTCCGGGCCGAGCTCTACGGCCTGATGGAGGGGGCCCTCGAGGCCGTGCGCTGGGCGGTCC  
GGCGGGCGCGGGAGGCCGCGGCCAAGTCTCTGGAGCCCGAGGGGCGAGGGGGTCCGGC  
GCCCGGGGCCCTCCTCGCCACCTCCTCCGGGAGCGGGCCCTCCTGGAGCTTTCGCCAGG  
CCCCTCAGTGGCGGGTGGCGTAGGGCTCCCGCCGGGCTAAGCTGGAGGTAGCCCATCCAGG  
GCCTCTGGGGGGTGGCTTGTGTATCAAGACTGGCTGTTCAAGGACTGCCAGGGGGCTGGCG  
CCTCCGCTACCGCCGAACGGGGCGGCTACGAGGCCTCCCGGGACGGTGAGAGGTGGGAG  
AAGTCCCCTCGTACGGAGGTTACGGGGCGCCTGAACAAGAACCTTCAGGACTGGGCCGT  
GCGCCAGGTGGTGGAGTACCTCCAGGGGGAGCTGGTCCCCCGGAGATCCCCGGGGGAGTA  
TAACCTGCTGCAGTTAATTAA

> Tth origin of replication derived from pTT8

GCGGCCGCTTGACGTCTACCGCTAGGGACCCCGGGGGGTGAGCGCCCGCTCAGCGCCCGGG  
GTGAGCGGTGAGCGCTCACCTGAGCGCCTGGGTAGACTGGGGTCTGGAGCACCCGGAAG  
GGGAAGACCCGACCCTCCTGCCCCGGCCTTGGCCGCCCGGGCCCTGGGGGTCTCCCCGGCC  
ACCCTCCGGCGCTACGCCGCCCTGTGGGAGCGGTTGGTAGGTCCCCTGCCCGGGATCCCCG  
GGGGGGACGGCTCTGGCCCAAGGAGGCCCTGGCCCGCCTCCGGGCGGCCCGGGAGGCCAC  
CTGCGGGAAGGCCTCCCCCTGGAGGAGGCCCTGGCCCGGTCCAGGGAGACTTCCCGGCCCT  
CGCCCTCCCCTCCGAGGGGGAGGCCCTGGCCCTCCTCCGGGCCCTGGCCGAGCGGCTGGAGC  
GGGTGGAGGGGGAGCTAAGGGCCCTGCGGGAGGAGAACGCCCGCCTCCGGGAGGCCCTGA  
AGGCCCTGGAGCCCCCGCGGAGGCGGCCCTGGTGGCGGTTCTGGGGGCATTGACCTGGGGA  
CTACCGCTTGGTCCCGGGGCTTGTGCTAGAAATGGGGGGCATGAATGAAACAGACCTCGGCC  
GGGTTAACCGCCGAGGCCTCTCCTCCCAGGAGGCCTCCATCCTAACCCGGCCGGGGGGAAG  
GAGGCAAGAGATGGAGCACCAACCCGGCCGGAAGCGCAAATCCCGGACACCCTCGCTAAA  
ATCGCAGGACTCTTCCAGATAAACCCCGACCTGGGGGAGGTGGTTCTTCGCGCCTACGCCGCC  
CTGCGCGCCTCTCCCCGGAGGCCCTCCGCGCCACCTCCTGGCCCTCCCCTCCGCCCGGAG  
CGGGCCCGGGAGGCCCTTCCAGCGGCCCTACCTCGCCACTTCGCCCAGACTCTCCCCGCTAC  
CCCTACGCCACGACGACCCCAAGGAGGGGGTGCATCTACAAGCGGGAGAACGCCCTGA  
AGCGGGTCCACGTCCAGGTGGGCCACTACCCCAACCGGTCTTGGCGGTGGTGGTGGACGTG  
GACCTCCCCTGGCCCCAGGTGGAGGAGCGGATCCACGCCCTCCCCCTCCCTGGTCTGGTC  
AACCCGAGATCGGGCCACTTCCACGCCTGGTACGAGCTGGACCCCATCCCCCTCACGCCCCG  
CCCGGGCGGGAGGGGAGCCTGAAGGGGGCCCTGGCCCTTCTCGCGGAGGTGGAGGCCCTGC  
TGGAGGCCTACTACGGGGCGGACCCGGGCTACAACGGTCTCCTCTCCCGAAACCCCTTCTCC  
ACCCCGGAGTGGACCTGGGGCGGGGGGAAGCGGTGGAGCCTGCGGGACCTCCACCGGG  
AGCTCCGGGGGCTCCTTCCCTCCGGGACCCGGAGGCGGGTGGACCCGGGCCTGGCCTCTAC  
GGGCGGAACAACGCCCTGTTTGACCGCCTGCGGGCGGAGGCCTACGCCACGTGGCCCTCTT  
CCGGGGCGTCCCCGGGGGGGAGGAGGCCTTCCGGGCCTGGGTGGAGCAGAGGGCCACGC  
CCTGAACCAGTCCCTTCCGGGACCCCAAGGGGCCCTTGACCCCGGGAGGTCCACCA  
CACGGCGAAGAGCGTGGCCAAGTGGACCTACCGGAACTACCGGGGGGGCGAGGGTCTACCCG  
GTCTCCTCACGGGGAGGCCGGACCGGAGCCGCCTCTCCCCAGGCCCGGGCCCTGATCCC



GCCCCTCCAGGGCCAGGAGCTCCAGGAGGCGGTGCGGGAGGGCGGAAGGCGGCGGGATC  
CCGGCGCAGGCAGGAGGCGGAGGAGAGCTCACGGAGGCCCTGAAGCGCCTCCAGGCCCGG  
GGGGAGCGGGTCACGGCCAGGGCCCTGGCCCGGAGGCGGGGGTCAAGCCCCATACCGCCT  
CCAAGTGGTTGAAGAGGATGCGGGAGTAGCGTCCAGGACGGCACAACCCCAAAAATGTGC  
CCCAAGCTGGTGGCTATCAGGGTATACAGGCGGGGGTGCAGGGGGTGAACCCCGCCAGCC  
CCGAAGGGGCTGTATTGGAGAACCTAGAGAGTCTCCTTAGCGTAGTTGACGGCTAAAGTCCC  
CCTTCTTTTTCTGGAAGCCGCAAAAATTTTGTTCCTTGGGGTAGACACCTTGAGATCCGAG  
AGAAAGTGAGATAACTCACATATTTACCCCGCCCGCACGCAATTTTCATCGTCCAGGACGGCA  
AAAACACTGATTTTCCCCCTCGAGGACCGCCCCTAAAACGGCTTTTAGGCGGGGGGGTGGGCG  
GCGGGACCAATCCACCCTCCCCCGCCCCGGCCTTCTAGGGGCCTTAGGACGGGTGAGA  
GGGTCTTCTGGGGCAGGGTCCGGAGCCCGCTCTGGCCCGGGGGCTGGACCGGCCCTCG  
GCGCTCAAGCGTAGACAGGGAGACCCCTCCATAGCCTGCAGTTAATTAA

> Ec replication origin derived from pUC

AAGCTTAGCCGGAAGCATAAAGTGTAAGCCTGGGGTGCCTAATGAGTGAGCTAACTCACAT  
TAATTGCGTTGCGCTACTGCCCGCTTCCAGTCGGGAAACCTGTCGTGCCAGCTGCATTAATG  
AATCGGCAACGCGCGGGGAGAGGCGGTTTGCATTGGGCGCTCTCCGCTTCCCTCGCTCAC  
TGACTCGCTGCGCTCGGTGTTCCGGCTGCGGCGAGCGGTATCAGCTCACTCAAAGGCGGTAA  
TACGGTTATCCACAGAATCAGGGGATAACGCAGGAAAGAACATGTGAGCAAAGGCCAGCA  
AAAGGCCAGGAACCGTAAAAAGGCCGCGTTGCTGGCGTTTTTCCATAGGCTCCGCCCCCTGA  
CGAGCATCACAAAATCGACGCTCAAGTCAGAGGTGGCGAAACCCGACAGGACTATAAAGAT  
ACCAGGCGTTTCCCCCTGGAAGCTCCCTCGTGCCTCTCCTGTTCCGACCCTGCCGTTACCGG  
ATACCTGTCCGCTTTCTCCCTTCCGGGAAGCGTGGCGCTTTCTCAAAGCTCACGCTGTAGGTAT  
CTCAGTTCGGTGTAGGTGCTTCGCTCCAAGCTGGGCTGTGTGCACGAACCCCGTTCAGCCC  
GACCGCTGCGCCTTATCCGGTAACTATCGTCTTGAGTCCAACCCGGTAAGACACGACTTATCG  
CCACTGGCAGCAGCCACTGGTAACAGGATTAGCAGAGCGAGGTATGTAGGCGGTGCTACAG  
AGTTCTGAAGTGGTGGCCTAACTACGGCTACACTAGAAGAACAGTATTTGGTATCTGCGCTC  
TGCTGAAGCCAGTTACCTTCGGAAAAAGAGTTGGTAGCTCTTGATCCGGCAAACAAACCACCG  
CTGGTAGCGGTGGTTTTTTTTGTTTGCAAGCAGCAGATTACGCGCAGAAAAAAGGATCTCAAG  
AAGATCCTTTGATCTTTTCTACGGGGTCTGACGCTCAGTGGAACGAAAACCTCACGTTAAGGGA  
TTTTGGTCATGAGATTACAAAAGGATCTTACCTAGATCCTTTTAAATTAATAAAGTTT  
TAAATCAATCTAAAGTATATATGAGTAAACTGCGGCCGCTTGACGTC

> E.c. replication origin derived from pBBR (pSEVA1311)

AAGCTTAGGCCACCCGCGAGCGGGTGTTCCTTCTCACTGTCCCTTATTCGCACCTGGCGGTG  
CTCAACGGGAATCCTGCTCTGCGAGGCTGGCCGTAGGCCGGCCCTACCGGCGCGGCAGCGTT  
ACCCGTGTCGGCGGCTCCAACGGCTCGCCATCGTCCAGAAAACACGGCTCATCGGGCATCGG  
CAGGCGCTGCTGCCCGCGCCGTTCCATTCTCCGTTTCGGTCAAGGCTGGCAGGTCTGGTTC  
CATGCCCGAATGCCGGGCTGGCTGGGCGGCTCCTCGCCGGGGCCGGTCCGGTAGTTGCTGCT  
CGCCCGGATACAGGGTTCGGGATGCGGCGCAGGTGCCATGCCCAACAGCGATTCTGCTCTGG  
TCGTGCTGATCAACCACCGGCGGCACTGAACACCGACAGGCGCAACTGGTCCGCGGGGCTG  
GCCCCACGCCACGCGGTCAATTGACCACGTAGGCCGACACGGTGCCGGGGCCGTTGAGCTTCA  
CGACGGAGATCCAGCGCTCGGCCACCAAGTCCTTACTGCGTATTGGACCGTCCGCAAAGAA  
CGTCCGATGAGCTTGAAAGTGTCTTCTGGCTGACCACCGGCGTTCTGGTGGCCCATCTGC  
GCCACGAGGTGATGCAGCAGCATTGCCGCGTGGGTTTCTCGCAATAAGCCCGGCCACGC  
CTCATGCGCTTTGCGTTCCGTTTGCACCCAGTGACCGGGCTTGTTCCTGGCTTGAATGCCGATT  
TCTCTGGACTGCGTGGCCATGCTTATCTCCATGCGGTAGGGGTGCCGCACGGTTGCGGCACCA

TGCGCAATCAGCTGCAACTTTTCGGCAGCGGACAACAATTATGCGTTGCGTAAAAGTGGCAG  
TCAATTACAGATTTTTCTTTAACCTACGCAATGAGCTATTGCGGGGGGTGCCGCAATGAGCTGT  
TGCGTACCCCCCTTTTTAAGTTGTTGATTTTTAAGTCTTTCGCATTTCCGCCTATATCTAGTTCT  
TTGGTGCCCAAAGAAGGGCACCCCTGCGGGGTTCCCCACGCCTTCGGCGCGGCTCCCCCTCC  
GGCAAAAAGTGGCCCCTCCGGGGCTTGTTGATCGACTGCGCGGCCTTCGGCCTTGCCCAAGG  
TGCGCTGCCCCCTTGGAACCCCGCACTCGCCGCGTGAGGCTCGGGGGGCAGGCGGGCG  
GGCTTCGCCCTTCGACTGCCCCACTCGCATAGGCTTGGGTCGTTCCAGGCGCGTCAAGGCCA  
AGCCGCTGCGCGGTGCTGCGCGAGCCTTGACCCGCTTCCACTTGGTGTCCAACCGGCAAGC  
GAAGCGCGCAGGCCGAGGCCGAGGCTTTTTCCCCAGAGAAAATTAATAAAAATTGATGGGG  
CAAGGCCGAGGCCGCGCAGTTGGAGCCGGTGGGTATGTGGTGAAGGCTGGGTAGCCGGT  
GGGCAATCCCTGTGGTCAAGCTCGTGGGCAGGCGCAGCCTGTCCATCAGCTTGTCCAGCAGG  
GTTGTCCACGGGCCGAGCGAAGCGAGCCAGCCGGTGGCCGCTGCGGCCATCGTCCACATAT  
CCACGGGCTGGCAAGGGAGCGCAGCGACCGCGCAGGGCGAAGCCGGAGAGCAAGCCCCT  
AGGGGGGGCGGCCCTTGACGTC

> SlpA promoter - Kanamycin resistance gene - SlpA terminator

CTGCAGTTAATTAAGAAACCTTAAGGCCCGACCGTTTGACAAGGGCGCGTGAGGTTTTTACG  
ATAGCGCCGGATGCGGGGAAAAGGGCTCCTTTTGGGGGGTTTTCCCCGCACCGGGCGGACC  
TGGGCGGAGAGGAAACGCGGCAACTCGCCGTCTCGGGTCCC GCCACGACCCTTAAGGAG  
GTGTGAGGATT**ATG**AATGGACCAATAATAATGACTAGAGAAGAAAGAATGAAGATTGTTTCA  
GAAATTAAGGAACGAATATTGGATAAATATGGGGATGATGTTAAGGCTATTGGTGTATGG  
CTCTCTTGGTGTGTCAGACTGATGGGCCCTATTCGGATATTGAGATGATGTGTGTCATGTCAAC  
AGAGGAAGCAGAGTTTCAAGCATGAATGGACAACCGGTGAGTGGAAAGGTGGAAGTGAATTT  
TATAGCGAAGAGATTCTACTAGATTATGCATCTCAGGTGGAATCAGATTGGCCGCTTACACAT  
GGTCAATTTTTCTCTATTTTGCCGATTTATGATTCAGGTGGATACTTAGAGAAAGTGTATCAA  
CTGCTAAATCGGTAGAAAGCCAAAAGTTCCACGATGCGATTTGTGCCCTTATCGTAGAAGAGC  
TGTTTGAATATGCAGGCAAATGGCGTAATATTCGTGTGCAAGGACCGACAACATTTCTACCAT  
CCTTGACTGTACAGGTAGCAATGGCAGGTGCCATGTTGATTGGTCTGCATCATCGCATCTGTT  
ATACGACGAGCGCTTCGGTCTTAAGCAAGCAGTTAAGCAATCAGATCTTCCCTCAGGTTATG  
ACCATCTGTGCCAGTTCGTAATGTCTGGTCAACTTCCGACTCTGAGAACTTCTGGAATCGCT  
AGAGAAATTTCTGGAATGGGATTGAGGAGTGACAGAACGACACGGATATATAGTGGATGTGT  
CAAACGCATACCATTTTGAACGGAATTTATGCGGTGTGAAATACCGCACAGATGCGTAAGG  
AGAAAATACCGCATCAGGCGCCATTGCCATTGAGGCTGCGCAACTGTTGGGAAGGGCGATC  
GGTGCGGCCCTTTCGCTATTACGCCAGCTGGCGAAAGGGGGATGTGCTGCAAGGCGATTAA  
GTTGGGTAACGCCAGGGTTTTCCAGTCACGACGTGGCGCGCTGTAGCTAGTAAAGTTCTAA  
CCCCTGGCGGTCCC GCCCCCGCCCCCTTTGGGGGGGCGGGGGGTTTTTGTCTCCGCTAGC

> SlpA promoter - Hygromycin resistance gene - SlpA terminator

CTGCAGTTAATTAAGAAACCTTAAGGCCCGACCGTTTGACAAGGGCGCGTGAGGTTTTTACG  
ATAGCGCCGGATGCGGGGAAAAGGGCTCCTTTTGGGGGGTTTTCCCCGCACCGGGCGGACC  
TGGGCGGAGAGGAAACGCGGCAACTCGCCGTCTCGGGTCCC GCCACGACCCTTAAGGAG  
GTGTGAGGATT**ATG**AAAAAGCCTGAACTACCGCGACGTCTGTTGAGAAGTTTCTGATCGAA  
AAGTTCGGCAGCGTCTCCGACCTGATGCAGCTCTCGGAGGGCGAAGAATCTCGTGCTTTCAGC  
TTCGATGTAGGAGGGCGTGGATATGTCTGCGGGTAAATAGCTGCGCCGATGGTTTCTACAA  
AGATCATTATGTTTATCGGCACTTTGCATCGGCCGCGCTCCCGATTCCGGAAGTGCTTGACATT  
GGGGAATTTAGCGAGGGCCTGACCTATTGCATCTCCCGCGTGCACCGGGTGTACGTTGCAA  
GACCTGCCTGAAACCGAACTGCCCGCTGTTCTGCAACCGGTGCGGAGGTTATGGATGCGATC

GCTGCGCCGATCTTAGCCAGACGAGCGGGTTCGGCCCATTCGGACCGCAAGGAATCGGTCA  
ATACACTACATGGCGTGATTTTCATCTGCGCGATTGCTGATCCCCATGTGTATCACTGGCAA  
GTGATGGACGACACCGTCAGTGCCTCGTCGCGCAGGCTCTCGATGAGCTGATGCTTTGGG  
CGAGGACTGCCCCGAAGTCCGGCACCTCGTGCACGCGGATTCGGCTCCAACAATGTCCTGAC  
GGACAATGGCCGCATAACAGCGGTCAATTGACTGGAGCGAGGCGATGTTTCGGGGATCCCCTAT  
ACGAGGTCGCCAACATCTTCTTCTGGAGGCCGTGGTTGGCTTGTATGGAGCAGCAGGCGCGC  
TACTTCGAGCGGAGGCATCCGGAGCTTGCAGGATCGCCGCGGCTCCGGGCGTATATGCTCCG  
CATTGGTCTTGACCAACTCTATCAGAGCTTGGTTGACGGCAATTCGATGATGCAGCATGGGC  
GCAGGGTTCGATGCGACGCAATCGTCCGATCCGGAGCCGGGACTGTCGGGCGTACACAAATCG  
CCCGCAGAAGCGCGGCCGTCTGGACCGATGGCTGTGAAGAAGTACTCGCCGATAGTGAAAC  
CGACGCCCCAGCACTCGTCCGAGGGCAAAGGAATAGAGATGGCGCGCCTGTAGCTAGTAAAG  
TTCTAACCCCTGGCGGTCCCGCCCCCGCCCCCTTGGGGGGGCGGGGGGTTTTTGTCTCCCG  
CTAGCC

> SlpA promoter - Bleomycin resistance gene - SlpA terminator

CTGCAGTTAATTAAAGAAACCTTAAGCCCCGACCGTTTGACAAGGGCGCGTGAGTTTTTACG  
ATAGCGCCGGATGCGGGGAAAAGGGCTCCTTTTGGGGGGTTTTCCCGCACCGGGCGGACC  
TGGGCGGAGAGGAAACGCGGCAACTCGCCGTCTCGGGTCCCGCCCACGACCCTTAAGGAG  
GTGTGAGGATT**ATG**GCCAAGTTGACCAGTGCCGTTCCGGTGCTCACCGCGCGCGACGTCGCC  
GGAGCGGTGAGTTCTGGACCGACCGGCTCGGGTCTCCCGGGACTTCGTGGAGGACGACTT  
CGCCGGTGTGGTCCGGGACGACGTGACCCTGTTTCATCAGCGCGGTCCAGGACCAGGTGGTGC  
CGGACAACACCCAGGCCTGGGTGTGGGTGCGCGGCCTGGACGAGCTGTACGCCGAGTGGTC  
GGAGGTCGTGTCCACGAACCTCCGGGACGCCTCCGGGCGGCCATGACCGAGATCGTCGAGC  
AGCCGTGGGGGCGGGAGTTCCGCCCTGCGCGACCCGGCCGGCAACTGCGTGCCTTCGTGGCC  
GAGGAGCAGGACTAATCTAGGCGCGCCTGTAGCTAGTAAAGTTCTAACCCCTGGCGGTCCCG  
CCCCGCCCCCTTGGGGGGGCGGGGGGTTTTTGTCTCCCG**GCTAGCT**

> SlpA promoter - RBS - ATG

CTGCAGTTAATTAAAGAAACCTTAAGCCCCGACCGTTTGACAAGGGCGCGTGAGTTTTTACG  
ATAGCGCCGGATGCGGGGAAAAGGGCTCCTTTTGGGGGGTTTTCCCGCACCGGGCGGACC  
TGGGCGGAGAGGAAACGCGGCAACTCGCCGTCTCGGGTCCCGCCCACGACCCTTAAGGAG  
GTGTGAGGATT**ATG**

> SlpA terminator

GGCGCGCCTGTAGCTAGTAAAGTTCTAACCCCTGGCGGTCCCGCCCCCGCCCCCTTGGGGGG  
GCGGGGGGTTTTTGTCTCCCG**GCTAGC**

> Pnqo

GCTAGCCTCCAGGGCCTTCTTCCGCCCCCAAGGTGTGGAGCAGCCTGGTGCGCCTCACCC  
CCACGGGCGCCCCGGACGACCCCGCCTCTCCGCCTCGTTGAGGCCGCTTCGGAAAGCGG  
CGGAAGACCCTCTTAAACGCCCTGGCCGCGGCCGGCTACCCCAAGGCGCGGGTGGAGGAGG  
CCCTGAGGGCCTTGGGCCTTCCCCTAGGGTGCGGGCCGAGGAGCTGGACCTCGAGGCCTTC  
CGCCGGCTGAGGGAGGGCCTCGAGGGGGCGGTGTAGGCCCGCCTCCCTTCCCTACACCGTTC  
CTTCTCCTTCTGTGTAGCCACCCCTTGCGCCACCCCGGGGTGATAAGATGGGCAGGAA  
ATGAGGCCGGCCCCCTTGGGGCTTGGGGACCGGTTTCGTGAAGAAGAAATCTTTCGTGCACG  
AAAGGAGGGG**CATATG**

> Pnqo3A, deleted region indicated

GCTAGCCTCCAGGGCCTTCTTTCCGCCCCCAAGGTGTGGAGCAGCCTGGTGCGCCTCACCC  
CCACGGGCGCCCCGGACGACCCCGCCTCTCCGCCTCGTTGAGGCCGCCTTCGAAAGCGG  
CGGAAGACCCTCTTAAACGCCCTGGCCGCGCCGGCTACCCCAAGGGCGGGGTGGAGGAGG  
CCCTGAGGGCCTTGGGCCTTCCCCCTAGGGTGGGGCCGAGGAGCTGGACCTCGAGGCCTTC  
CGCCGGCTGAGGGAGGGCCTCGAGGGGGCGGTGTAGGCCCGCCTCCCTTCCCTACACCGTTC  
CTTCTCCTTCTGTGTAGCCCACCCCTTGCGCCACCCGGGTGATAAGATGGGCAGGAA  
ATGAGGCCGGCCCTTTGGGGCTTTGGGGACCGGTTTCGTGAAGAAGAATTCTTTCGTGCACG  
AAAGGAGGGGCATATG

> IFP gene

CATATGAGCAAAGGAGAAGAAGCTTTTCACTGGAGTTGTCCCAATTCTTGTTGAATTAGATGGT  
GATGTTAATGGGCACAAATTTCTGTCCGTGGAGAGGGTGAAGGTGATGCTACAAACGGAAA  
ACTCACCTTAAATTTATTTGCACTACTGAAAACACTGTTCCGTGGCCAACACTTGTCACTA  
CTCTGACCTATGGTCTTATGTGCTTTTCCGTTATCCGGATCACATGAAACGGCATGACTTTTTC  
AAGAGTGCCATGCCCGAAGGTTATGTACAGGAACGCACTATATCTTTCAAAGATGACGGGAC  
CTACAAGACGCGTGCTGAAGTCAAGTTTGAAGGTGATACCCTTGTTAATCGTATCGAGTTAAA  
GGGTATTGATTTAAAGAAGATGGAAACATTCTTGACACAAACTCGAGTACAACCTTTAACTC  
ACACAATGTATACATCACGGCAGACAAACAAAAGAATGGAATCAAAGCTAACTCAAATTCG  
CCACAACGTTGAAGATGGTTCCGTTCACTAGCAGACCATTATCAACAAAATACTCCAATTGG  
CGATGGCCCTGTCTTTTACCAGACAACCATTACCTGTCGACACAATCTGTCCTTTCGAAAGAT  
CCCAACGAAAAGCGTGACCACATGGTCTTCTTGAGTTTGTAACTGCTGCTGGGATTACACAT  
GGCATGGATGAGCTCTACAATAATAAAAGCTT

> Plac

GCTAGCACGACAGGTTTCCCGACTGGAAAGCGGGCAGTGAGCGCAACGCAATTAATGTGAGT  
TAGCTCACTCATTAGGCACCCCAGGCTTTACACTTTATGCTTCCGGCTCGTATGTTGTGTGGAA  
TTGTGAGAAATTCTTTCGTGCACGAAAGGAGGGGCATATG

> P3K

GCTAGCGTTTAAACTCTTACAGCTTGACGGCGTTTTTGTCTTGAGCGATTCAGGGACGTTTCG  
CCAGTAGGTGGTTTTTCGAGCCGACTGCGTGGTCACTGACCTCGTACCAGCGCC  
GAGCTTGAGCTGACGCCCGCGGTACATGATGACCTTGATGCGGTCGGtCTGCTGGACCA  
GCACGTTGTCGTTGTTCCCTTGATCGAGGTGGTATTGAACTCCTCACCCAGCGTCGTTGTC  
AGCTGCGTTGGCGTGCCTTAGGGTGGTGGCTTTGTCCGGGCCGATCCACTGGATCGTGGATT  
TGCTGAGTTGATGTTGTCGGCTCCGGCGGCTGGCGCACGGTGAGGTTACGTAAGTGCAGT  
CTAGAGAAATTCTTTCGTGCACGAAAGGAGGGGCATATG

> P16S

GCTAGCTCTACCGCGAGTTTACTCGTGGAGCGCTTCATTGAGGAGATCCGCTGCCCTCGCAA  
GCCTTGACAAAAGGAGGGGGATTGATAGCATGGCTTTCTGAATTCTTTCGTGCACGAAAG  
GAGGGGCATATG

> Pnar

TCTAGAGGATCCCCGGGTACCCAGGGCCTTGACCCGCTCCCTGAGGTAGCGGGGGTCTTGCT  
CCAGGGCGTGGGTGAAAAGGGGCTCGCGCCTCAGGGCCACGATCCCCGGGTAGCCCTCGCC  
AGGGCGAACCAGGGCCTTTCCAGGAAGGCCTCCCGGTGGGGGCCGTCGTAAGCGGTGAGGA

AGAGGTGCCGTCCTCAGGGTCGGCGAGGAAGAGCTCCGCCGCCTCCATGCATGGCGAGGG  
CCTCCCGGAGGGCCCGGAGGAAGTCTGGACTCCTTAGGCGAAGGCCTCCGGGTGCCGGAG  
CAGGTGCTGGGTGAGGTAGGAGGCTTCCCGCAGGAGGTCGGGCCCTTGGTCCGCTCGGGG  
TAGAGCTCCACCAAGAACCCTTCCCCCTCCCGGTAGGCCTGGCACCGGAGCCTGCGCCCGTTC  
ACCACGAGGGGCGTGCTGGCGCGGTAGGCGCCCCGCTTCAGCTCCCGGAGCGCCGGGCACC  
GGGCGCAAAGCGGCCGCGCCGAAGGGTCTTTCCCTGGACCAGGTGGGCGCAGGGCACGCC  
CGCGGCGCGAAACCCAGGGAGGCTTCGGCCTCTACCTCCCGCACGAGGCCTTGACCGTCAA  
GGCGGATCCGCGCCAGGGCTTCCATCCGCCCTCAGCCTAGGGGGGTTCCGGTAGGACAGATG  
TCCCGGGGCTTGCCAGTGGGCGCGAGGAGGCCCGGGCACACTGGGGCCGGAGGTGACCATG  
GGCAGCAGCCATCATCATCATCACAGCAGCGGCCTGGTGCCGCGCGGCAGCCATATG

> LinkerA

GCTAGCGAGATATCATCTAGAAAACATATGAGGTACCAGAATTCCTAGTGGATCCAAGCTT

> Linker1

CATATGGTTCGACAAGATATCAGGATCCATCTAGAAAGCTT

> Linker2

CATATGGTTCGACAAGATATCAGGATCCATCTAGAAAGCTT

> Linker3

CATATGGGTCGACAAGATATCAGGATCCATCTAGAAAGCTT

Pnqo variants

> Pnqo209

GCTAGGGTGCGGGCCGAGGAGCTGGACCTCGAGGCCTTCCGCCGGCTGAGGGAGGGCCTCG  
AGGGGGCGGTGTAGGCCCGCCTCCCTTCCCTACACCGTTCTTCTCCTTCTGTGTAGCCCACCC  
CCCTTGCGCCCCACCCGGGGTGATAAGATGGGCAGGAAATGAGGCCGGCCCTTTGGGGCT  
TTGGGGACCGTTTTCGTGAAGAAGAATTCTTTCGTGCACGAAAGGAGGGGCATATG

> Pnqo91

GCTAGCCCCCTTGCGCCCCACCCGGGGTGATAAGATGGGCAGGAAATGAGGCCGGCCCTT  
TGGGGCTTTGGGGACCGTTTTCGTGAAGAAGAATTCTTTCGTGCACGAAAGGAGGGGCATAT  
**G**

> Pnqo72

GCTAGCACCCCGGGTGATAAGATGGGCAGGAAATGAGGCCGGCCCTTTGGGGCTTTGGG  
GACCGTTTTCGTGAAGAAGAATTCTTTCGTGCACGAAAGGAGGGGCATATG

> Pnqo57

GCTAGCATGGGCAGGAAATGAGGCCGGCCCTTTGGGGCTTTGGGGACCGTTTTCGTGAAGA  
GAATTCTTTCGTGCACGAAAGGAGGGGCATATG

> Pnqo33

GCTAGCTTTGGGGCTTTGGGGACCGTTTTCGTGAAGAAGAATTCTTTTCGTGCACGAAAGGAG  
GGGCATATG

>3Knqo72

GCTAGCGTTTAAACTCTTACAGCTTGACGGCGTTTTTGTCTTGAGCGATTCAGGGACGTTTCGC  
CCAGTAGGTGGTTTTTCGAGCCGTAAGTGCCTGACCTCGTCACCAGCGCC  
GAGCTTGGAGCTGACGCCGCCGGCGTACATGATGACCTTGATGCGGTCTGCTGGACCA  
GCACGTTGTCGTTGTTCCCTTGATCGAGGTGGTATTGAACTCCTCACCAGCGTCGTactagC  
CCGGGGTGATAAGATGGGCAGGAAATGAGGCCGCCCTTTGGGGCTTTGGGGACCGTTTT  
CGTGAAGAAGAATTCTTTTCGTGCACGAAAGGAGGGGCATATG

> Casette Hygromycin resistance gene - Thermosensor PA-sIFP- terminator

CTGCAGTTAATTAAAGAAACCTTAAGGCCGACCGTTTTGACAAGGGCGCGTGAGGTTTTTACG  
ATAGCGCCGGATGCGGGGAAAAGGGCTCCTTTTGGGGGTTTTCCCGCACCGGGCGGACC  
TGGGCGGAGAGGAAACGCGGCAACTCGCCGTCTCGGGTCCCGCCCACGACCCTTAAGGAG  
GTGTGAGGATTATGAAAAAGCCTGAACTCACCGCGACGTCTGTTGAGAAGTTTCTGATCGAA  
AAGTTCGGCAGCGTCTCCGACCTGATGCAGCTCTCGGAGGGCGAAGAATCTCGTGCTTTACAG  
TTCGATGTAGGAGGGCGTGGATATGTCCTGCGGGTAAATAGCTGCGCCGATGGTTTTCTACAA  
AGATCATTATGTTTATCGGCACTTTGCATCGGCCGCGCTCCCGATTCCGGAAGTGCTTGACATT  
GGGGAATTTAGCGAGGGCCTGACCTATTGCATCTCCCGCGTGCACCGGGTGCACGTTGCAA  
GACCTGCCTGAAACCGAACTGCCCGCTGTTCTGCAACCGGTCGCGGAGGTTATGGATCGCTGC  
GGCCGATCTTAGCCAGACGAGCGGGTTCGGCCATTTCGGACCGCAAGGAATCGGTCAATACA  
CTACATGGCGTGATTTTCATCTGCGCGATTGCTGATCCCCATGTGTATCACTGGCAAACCTGTGAT  
GGACGACACCGTCAAGTGCCTCGTCCGCGCAGGCTCTCGATGAGCTGATGCTTTGGGTGAGG  
ACTGCCCCGAAGTCCGGCACCTCGTGCACGCGGATTTCCGGTCCAACAATGTCCTGACGGACA  
ATGGCCGCATAACAGCGGTCATTGACTGGAGCGAGGCGATGTTCCGGGACCCCTATACGAG  
GTCGCCAACATCTTCTTCTGGAGGCCGTGGTTGGCTTGATGGAGCAGCAGGCGCGCTACTTC  
GAGCGGAGGCATCCGGAGCTTGCAGGATCGCCGCGGCTCCGGGCGTATATGCTCCGCATTGG  
TCTTGACCAACTCTATCAGAGCTTGGTTGACGGCAATTTTCGATGATGCAGCATGGGCGCAGGG  
TCGATGCGACGCAATCGTCCGATCCGGAGCCGGGACTGTGCGGCGTACACAAATCGCCGCA  
GAAGCGCGGCCGTGGACCGATGGCTGTGAAGAAGTACTCGCCGATAGTGAAACCGACG  
CCCCAGCACTCGTCCGAGGGCAAAGGAATAGAGATCAGCTTGCATGCCTGCAGGTGCAGCTCT  
AGAAAAAAAAACAAAAAGAAGGAGGATATACATATGAGCAAAGGAGAAGAACTTTTCACT  
GGAGTTGTCCCAATTCTTGTGAATTAGATGGTGATGTTAATGGGCACAAATTTTCTGTCCGTG  
GAGAGGGTGAAGGTGATGCTACAAACGGAAAACCTCACCTTAAATTTATTTGCACTACTGGAA  
AACTACCTGTTCCGTGGCCAACACTTGTCACTACTCTGACCTATGGTCTTATGTGCTTTTCCCGT  
TATCCGGATCACATGAAACGGCATGACTTTTTCAAGAGTGCCATGCCGAAGGTTATGTACAG  
GAACGCACTATATCTTTCAAAGATGACGGGACCTACAAGACGCGTGCTGAAGTCAAGTTTGAA  
GGTGATAACCCTGTTAATCGTATCGAGTTAAAGGGTATTGATTTTAAAGAAGATGGAAACATT  
CTTGGACACAACTCGAGTACAACCTTAACTCACACAATGTATACATCACGGCAGACAAACAA  
AGAATGGAATCAAAGCTAACTTCAAATTCGCCACAACGTTGAAGATGGTTCCGTTCAACTA  
GCAGACCATTATCAACAAAATACTCCAATTGGCGATGGCCCTGTCCTTTTACCAGACAACCATT  
ACCTGTGCACACAATCTGTCTTTGAAAGATCCCAACGAAAAGCGTGACCACATGGTCCTTCT  
TGAGTTTGTAACTGCTGCTGGGATTACACATGGCATGGATGAGCTCTACAAATAAGAATTCAG  
GGTTTTCCAGTCACGACGTGGCGCGCCTGTAGCTAGTAAAGTTCTAACCCCTGGCGGTCCCG  
CCCCGCCCTTTGGGGGGGGCGGGGGTTTTTGTCTCCCGCTAGC

Thermosensors

> DF

TCTAGACCTCCTTCAAAAAAGAAGGAGGATATACATATG

> PA

TCTAGAAAAAAACAAAAAGAAGGAGGATATACATATG

> TS0

TCTAGAACTCCTTCAAAAAAGAAGGAGGATATACATATG

> TS1

TCTAGACCTCCTTAACAAAAAGTTAAGGAGGATATACATATG

> TS2

TCTAGACCTCCTTAGCAAAAAAGCTAAGGAGGATATACATATG

> TS4

TCTAGACCTCCTTACGCAAAAAAGCGTAAGGAGGATATACATATG

> TS6

TCTAGACCTCCTTACGCGCAAAAAAGCGGTAAGGAGGATATACATATG

> TS8

TCTAGACCTCCTTAAAGCAAAAAAGCTAAGGAGGATATACATATG

> TS10

TCTAGACCTCCTTCAAAAAAAAAAAAAAAAAAGAAGGAGGATATACATATG

> TSP

TCTAGACCTCCTTCAAAAAAGAAGGAGGTACCAGATG

> beta-galactosidase gene

CATATGTCGACCGTTTGTTACTACCCGGAGCATTGGCCTGAAGAACGTTGGGAAGAGGACTTT  
AAGGCCATGCGGGCTCTGGGGCTCCGCTATGTGCGCCTGGGGGAGTTTGCCTGGAGCGCCCT  
CGAGCCCACCCAGGTGCTCTCCGCTGGGGTTGGCTGGATCGGGTTCTGGATCTGGCGCAGA  
AGGAGGGCCTAGCCGTAGTCCTCGGTACCCCCACCGCTACCCCCCAAGTGGTTGGTGGACC  
GGTACCCGGAGATCCTCCCTGTGGACCGGGAGGGGCGGAGGCGGAACCTTTGGTGGGCGGCG  
GCACTACTGCTTCTCCAGCCCCGCTACCGGGAAGAGACTGCCCGCATCGTGGCCCTTCTAGC  
GGAGCGTTACGGCCGCCACCCGCGGTGGTAGGGTTCCAGGTGGACAACGAGTTTGGCTGTC  
ACGGCACCGTGCGCTGCTACTGTCCCACTGTCGTGAGGCCTTCCGGGGCTGGTTGAGGGCT  
AAGTACGGGACGATTGACGCGCTGAACGCCGCTGGGGAACGGTCTTTTGGAGCCAAACGTA  
CCGGGATTTGCGTGAGGTGGAGCTTCTCACCTCACCGTGGCCGAGGCCAACCCAGCCACCT  
TCTGGACTACTACGTTTTGCATCAGACCAGGTGCGGGCCTACAATCGTTTTCCAAGTGGACCT  
CCTTCGGGATAATGCTCCTGGCCGGTTCATTACCCATAACTTCATGGGGTTTTTACCCGATCG  
GACCCCTTTGCCTTGGCCGAGGACCTGGATTTTGCCGCTGGGACAGCTACCCCTTGGGCTTC  
ACCGACCTGATGCCCTTCCCCAGGAGGAGAAGGTTCAAGTGGGCCCGCACGGGCCACCCCGA  
TGTGGCCGCTTCCACCACGACCTTTACCGGGGGTAGGGCGGGGGCGTTTTTGGGTCATGG  
AGCAGCAGCCGGGTCCCGTGAACCTGGGCCCCACAATCCAAGCCCGGCGCCCGGGATGGTA  
CGCCTTTGGACTTGGGAGGCCATAGCCATGGGGCAGAGGTGGTTTTCTACTTCCGCTGGCG  
CCAAGCGCCCTTTGCCAAGAGCAGATGCAAGCGGGTTCAACCGTCCAGATTTCCAGCCGG  
AAGTGGCCTTTTTTGAAGTGCAGCGGTAGCAGAGGAGCTTCCGCCCTCCCCCTTCTCCCGC  
AGGGTGTGCCCCGTGGCTTTGGTTTATGATTCCGAGGCGGCTTGGGTGTTTGGAGATCCAGCC  
CCAAGGGGCCGAGTGGAAATACCTGACCCTGGTGTTCCTTTTATAGCGTTTTCCGGCGCCT  
AGGGTTGGAAGTGGACATTTTTAAGCCCGGGCAGAATTGGGCGGGTATGGCCTGGTGGTG  
GTTCCAGCCTGCCATTGTGCGTAAGGAGGCCCTCGAGGCCCTTCCAGGCGGACGGCCTG

GTAATTGTCGGACCCCGTTCGGGGAGCAAACGGAGAAATTCCAGATCCCCCGAAATCCCT  
CCGGGCGCGCTCCAAGCCCTCCTTCCCCTTAAGGTAGTGCGGGTGGAGAGCCTGCCCCGGG  
GCTTTTGGAGGAGGCCGAAGGACCCTGGGGCCGCTTTCCTTCGGGGTTTGGCGGGAGTGG  
GTGGAGACCGATCTTCCCCCTTGCTCCGTTTTACGGATGGTGGGGGAATCCTTTCCGCAGG  
GGTCGCTACCTGTACCTGGCGGCTTGCCAGCCAGAACTTCTCTTTGCCCTTTGCCAGTCT  
TGGCCGAGGAGGCGGGCTTGCATCCCCGCTTCTCCCTGAGGGCCTGCGTTTACGGAGACGG  
GGCCCGTTGGTGTTCCTTTAACTATGGCCCCGAGGTGGTGGAGGCACCTGCCCTCCAGGG  
GTGCGGTTTCTCTTGGGGGATAGGCGTATCCCCCATGACCTTGCCGTGTGGGAGGAGAC  
ATGAGGCTTGTACTGGGCGGCTTGGAGGTGCCCTGAAGGCCAAGGGGTGGAGGTCTTGG  
AAGACGGGGCCCTCCTATGGGGCTCAGAGGTACGGGTCCACGCTCCTTTTCGGGCAGAGGGA  
CCTGCAGCCAAGCTT

> CrtB, phytoene synthase

**CATATG**AAAATGCCCGCAAGTATGGAGCCCGACTGGAAAGCCCTCCTCCGCGTCTCCGCGCC  
CACTCCGCCACCTTCTACCTGGGAAGCCTCCTTCCCCAAGGAGGCCCGCAAGGGGGCCTGG  
GCGGTCTACGCCGCTGCCGCTGGGGGACGAGGCGGTGGACGGGGAGGGCGGGGGCCCG  
GAGGCCCTCGAGGCCTGGTGGGCGGGGGTGGAGCGGGCCTACCGGGGAAGGCCCTCGCC  
GAGTGGGAGAAGGGCCTCGCCTGGGCCCTGGAGCGCTGGGACATCCCCTTTGAGGCCTTCT  
CCACATGCGGGAGGGCTTCTGACCGACCTCGGCCCGTGCGGCTCGGGACGGAGGCGGAG  
CTCCTCCGGTACTGCTACCAGGTGGCGGGCACCGTGGGGCGGATGATGGCCCCATCGCCGG  
GGGCGGCAAGGAGGCGGAAGCCCGGGCGGTGAAGCTGGGGCAGGCCATGCAGCTACCAA  
CATCCTCCGGGACGTGGGGGAGGACCTGGAGCGGGACCGGGTCTACCTGCCCTTGGACCTCC  
TCCGGGCCACGGGGTGGAGGTGGAGGACCTGCGGGCGGGGCGCGTACCCCAAGGTACCG  
GGCCCTCATGGCCACCTGGAGGGGAAGGCCCGGGCCCTTTACCGGGAGGGGCTTGCGGGC  
CTAGGCCACCTCAAGGTGGGCCGGGCGGCCATCGCCCTTGCCGCTTGCAGTACCGGGGAT  
CCTGGACAAGCTCAGGCTTTCAGGCTACGACAACCTGGGAAGGCGGGCCACCTCAAGGCCT  
GGGAACGGGCCCTCCTCCTCCCCAAGGCCTTCTCGCCGCCGCTTCCCCCAAGGCCGGAGG  
GAAGCCCCTGAtgggcccccttctcgtctggcaccggggcgacctccgctccacgaccaccggccctctggaggcc  
ctcggggggggccagtggtgggctcgtggtcctggacccaacaacctgaagaccaccccgaggcggggctggttc  
ct**AAGCTT**

> Alkaline phosphatase

**CATATG**AAGCGAAGGGACATCCTGAAAGGTGGCCTGGCTGCGGGGGCCCTGGCCCTCCTGCC  
CCGGGGCCATACCCAGGGGGCTCTGCAGAACCAGCCTTCTTGGGAAGGCGGTACCGCAACC  
TCATCGTCTTCGTCTACGACGGGTTTTCTGGGAGGACTACGCCATCGCCAGGCCTACGCC  
GGAGGCGGCAGGGCCGGGTCTGGCCCTGGAGCGCTCCTCGCCCGTACCCCAACGGGCTC  
ATCAACACCTACAGCCTCACCAGCTACGTACCGAGTCCAGCGCCGCGGGGAACGCCTTCTCC  
TGCGGGGTGAAGACGGTGAACGGGGGGCTCGCCATCCACGCCGACGGGACCCCCCTCAAGC  
CCTTCTTCGCCGCGGCCAAGGAGGCGGGGAAGGCCGTGGGGCTCGTGACCACCACCACCGTC  
ACCCACGCCACCCAGCGAGCTTCGTGGTGTCCAATCCCGACCGGAACGCCGAGGAGAGGAT  
CGCCGAGCAGTACCTGGAGTTCGGGGCCGAGGTGTACCTTGGGGGCGGGGACCGCTTTTTCA  
ACCCGCCAGGCGCAAGGACGGGAAGGACCTTACGCCGCTTCGCCGCAAGGGGTACGG  
GGTGGTGCGCACCTCGAGGAGCTCGCCGTTCCAACGCCACCCGGCTCCTGGGCGTCTTCGC  
CGACGGCCACGTGCCCTACGAGATTGACCGCCGCTTCCAGGGCCTTGGGGTCCGAGCCTCA  
AGGAAATGGTCCAGGCCGCTTTGCCCGGCTTGGCGCCACCGCGGGGGCTTCGTCTTTCAG  
GTGGAAGCGGGGCGGATTGACCACGCCAACCATTTGAACGACGCCGGGGCCACCCCTTGGGA  
CGTGCTGGCGGCGGACGAGGTCTGGAGCTCCTACCGCCTTCGTGGACCGGAACCCGGACA



CCCTCCTCATCGTGGTCTCGGACCACGCCACCGGGGTAGGGGGGCTTTACGGGGCCGGGCGG  
 AGCTACCTGGAGAGCTCCCCGAGGGGTGGACCTCCTGGAGCCGACGCGGGCGAGCTTTGAGC  
 ACATGCTCCGCGTCCTCGGCCAGGCCCGGAGGCCTCCAGGTCAAGGAAGCCTTCCGGGCC  
 ATGAAGGGGGTGGACCTCGAGGACGCCGAGGCGGAAAGGGTGGTGCGGGCCATCCGGGAG  
 AAGGTCTACTGGCCGAGGGGGTGCGCCAGGGGGTCCAGCCCGCCAACACCCTGGCCTGGG  
 CCATGGCGCAGCGGAACGCCCAGAAGCCCCGACCGACCCAACATCGGCTATAGCTCCGGCCAG  
 CACACGGCAAGCCCCGTGATGCTCCTCCTCTACGGCCAGGGCCTGCGCTTTGTGAACCTGGGC  
 CTCGTGGACAACACCCACGTCTCCGCCTCATGGGGGAGGCCCTTGGCCTCCGCTACCAGAAC  
 CCGGTGATGAGCGAGGAGGAGGCCCTGGAGATCCTCAAGGCCAGGCCCCAGGGGATGCGCC  
 ACCCCGAGGACGTCTGGGCCTAAgtcgacgctAAGCTT

> *Pseudomonas fluorescens* esterase I variant 34

CATATGAGCACATTTGTTGCAAAGACGGTACCCTGATCTATTTCAAGGACTGGGGCAGCGGT  
 AAACCGGTGTTGTTCAGCCACGGTTGGCTACTGGATGCCGACATGTGGGAATACCAGATGGA  
 GTACCTCAGCAGCCGCGGCTATCGCACCATCGCCTTTGACCGCCGCGGCTTTGGCCGCTCGGA  
 CCAACCCTGGACCGGCAACGACTACGACACCTTCGCCGACGACATCGCCAGTTGATCGAACA  
 CCTGGACCTCAAGGAGGTGACCCTGGTGGGCTTCTCCATGGGCGGCGGCATGTGGCCCCGT  
 ACATCGCCCCGCCACGGCAGCGCACGGGTGGCCGGCCTGGTGCTGCTGGGCGCCGTCACCCCCG  
 CTGTTCGGCCAGAAGCCCGACTATCCGCAGGGTGTCCCGCTCGATGTGTTGCAAGGTTCAAG  
 ACTGAGCTGCTGAAGGATCGCGCGCAGTTTCATCAGCGATTTCAACGCACCGTTCTATGGCATC  
 AACAAGGGCCAGGTCTCTCCAAGGCGTGCAGACCCAGACCCTGCAAATCGCCCTGCTGGC  
 CTCGCTCAAGTCCACGGTGGATTGCGTCACCGCGTTCGCCGAAACCGACTTCCGCCCGGATAT  
 GGCCAAGATCGACGTACCCACCCTGGTATCCATGGCGATGGCGACCAGATCGTGCCGTTTCG  
 AGACCACCGGCAAAGTGGCGGCGGAGTTGATCAAGGGCGCCGAACTGAAGGTGTACAAGGA  
 CGCGCCCCACGGTTTCGCGGTGACCCACGCCAGCAGTTGAACGAAGACCTGTTGGCGTTCTT  
 GAAACGCGGATCCCATCATCATCATCATTGACTGCAGCCAAGCTT

**Table S5. References for component parts**

pEM2S (pMY1)<sup>2</sup>, pTT8<sup>4</sup>, kanamycin resistance gene<sup>6</sup>, pUC18, pSEVA131<sup>5</sup>,  
 hygromycin resistance gene<sup>7</sup>(and Bosch, Berenguer and Hidalgo, submitted),  
 bleomycin B resistance gene<sup>8</sup>, Pnqo<sup>9</sup>, PslpA<sup>10</sup>, Pnar<sup>11</sup>, GFP from pMKnqosGFP<sup>3</sup>, IFP  
 (Berenguer and Hidalgo unpublished), beta-galactosidase<sup>12</sup>, CrtB (phytoene synthase)  
<sup>13</sup>, alkaline phosphatase<sup>14</sup>, *Pseudomonas fluorescens* esterase I variety 34 (Mate,  
 Berenguer, Hidalgo, submitted). The sIFP gene combines the mutations of the  
 superfolder GFP (sGFP)<sup>15</sup> with those of the Citrine version of GFP<sup>16</sup>.

**Supporting Methods**

*Bacterial strains and growth conditions*

Growth of *T. thermophilus* strains was carried out at the indicated temperatures (55 to 65°C) with rotational shaking (150 rpm) in TB media. *T. thermophilus* colonies were grown aerobically on TB agar (1.5 % w/v agar) and the plates were supplemented with the relevant antibiotics. For liquid or solid selection, kanamycin (final concentration, 30 mg L<sup>-1</sup>) hygromycin B (100 mg L<sup>-1</sup>) and/or bleomycin (15 mg L<sup>-1</sup>) were included as indicated.

*Escherichia coli* strain DH5α was the host for plasmid construction and promoter testing. *E. coli* was grown at 37 °C in liquid or solid LB media, with kanamycin (30 mg L<sup>-1</sup>), ampicillin (100 mg L<sup>-1</sup>), hygromycin B (100 mg L<sup>-1</sup>) or bleomycin (3 mg L<sup>-1</sup>) added when required.

*E. coli* competence was induced following Inoue's method <sup>17</sup>. Transformation of *T. thermophilus* was achieved by natural competence as described <sup>18</sup>.

### *Plasmid Construction*

The DNA sequence of the Promoter 3K was synthesized by Genscript. The nqo promoter mutants were constructed using the oligonucleotides designed in Oligonucleotides List as Fw primers and the sIFPRv as Rv primer and cloned between sites NheI and HindIII in pMoTK110. The linkers were constructed by hybridization of the corresponding pair of oligonucleotides and cloning between sites NheI and HindIII of pMoTK110 for linker A and between sites NdeI and HindIII for linkers 1, 2, and 3, and the 16S promoter was also generated by hybridization and cloning of the corresponding phosphorylated oligonucleotides between sites NheI and EcoRI of pMoTK110 plasmid. All the thermosensor bearing genes were cloned into vector

pMoTH150 (see sequence and map below, Scheme S1) as XbaI-EcoRI fragments, that include the IFP gene, obtained by PCR performed with primers indicated in

Oligonucleotides List.

> pMoTH150

```
CTGCTGCAGTTAATTAAGAAACCTTAAGGCCGACCGTTTGACAAGGGCGCGTGAGGTTTT
ACGATAGCGCCGGATGCGGGGAAAAAGGGCTCCTTTGGGGGGTTTTCCCGCACCGGGCG
GACCTGGGCGGAGAGGAAACGCGGCAACTCGCCCGTCTCGGGTTCCCGCCACGACCCTAA
GGAGGTGTGAGGATTATGAAAAAGCCTGAACTCACCGCGACGTCTGTTGAGAAGTTTCTGAT
CGAAAAGTTCGGCAGCGTCTCCGACCTGATGCAGCTCTCGGAGGGCGAAGAATCTCGTGCTTT
CAGCTTCGATGTAGGAGGGCGTGGATATGTCCTGCGGGTAAATAGCTGCGCCGATGGTTTCT
ACAAAGATCATTATGTTTATCGGCACTTTGCATCGGCCGCGCTCCCGATTCCGGAAAGTGCTTGA
CATTGGGGAATTTAGCGAGGGCCTGACCTATTGCATCTCCCGCCGTGCACCGGGTGTACAGTT
GCAAGACCTGCCTGAAACCGAACTGCCCGTGTCTGCAACCGGTGCGGGAGGTTATGGATC
GCTGCGGCCGATCTTAGCCAGACGAGCGGGTTCGGCCATTTCGGACCGCAAGGAATCGGTCA
ATACACTACATGGCGTGATTTTCATCTGCGCGATTGCTGATCCCATGTGTATCACTGGCAAAC
GTGATGGACGACACCGTCAGTGCCTCGTTCGCGCAGGCTCTCGATGAGCTGATGCTTTGGGT
CGAGGACTGCCCGAAGTCCGGCACCTCGTGCACGCGGATTTTCGGTCCAACAATGTCCTGAC
GGACAATGGCCGCATAACAGCGGTCATTGACTGGAGCGAGGCGATGTTTCGGGGACCCCTAT
ACGAGGTCGCCAACATCTTCTTCTGGAGGCCGTGGTTGGCTTGATGGAGCAGCAGGCGCGC
TACTTCGAGCGGAGGCATCCGGAGCTTGCAGGATCGCCGCGGCTCCGGGCGTATATGCTCCG
CATTGGTCTTGACCAACTCTATCAGAGCTTGGTTGACGGCAATTTTCGATGATGCAGCATGGGC
GCAGGGTTCGATGCGACGCAATCGTCCGATCCGGAGCCGGGACTGTCGGGCGTACACAAATCG
CCCGCAGAAGCGCGGCCGTCTGGACCGATGGCTGTGAAGAAGTACTCGCCGATAGTGAAAC
CGACGCCCCAGCACTCGTCCGAGGGCAAAGGAATAGAGATCAGCTTGCATGCCTGCAGGTGC
ACTCTAGACCTCCTTCAAAAAAGAAGGAGGATATACATATGGGCAAAGGAGAAGAAGACTTTTC
ACTGGAGTTGTCCCAATTCTTGTGAATTAGATGGTGATGTTAATGGGCACAAATTTCTGTCC
GTGGAGAGGGTGAAGGTGATGCTACAAACGGAAACTCACCTTAAATTTATTTGCACTACTG
GAAACTACCTGTTCCGTGGCCAACTTGTCACTACTCTGACCTATGGTCTTATGTGCTTTTCC
CGTTATCCGGATCACATGAAACGGCATGACTTTTTCAAGAGTGCCATGCCCGAAGGTTATGTA
CAGGAACGCACTATATCTTTCAAAGATGACGGACCTACAAGACGCGTGCTGAAGTCAAGTTT
GAAGGTGATACCCTTGTTAATCGTATCGAGTTAAAGGGTATTGATTTTAAAGAAGATGGAAAC
ATTCTTGACACAAACTCGAGTACAACCTTAACTCACACAATGTATACATCACGGCAGACAAAC
AAAAGAATGGAATCAAAGCTAACTTCAAAATTCGCCACAACGTTGAAGATGGTTCCGTTCAAC
TAGCAGACCATTATCAACAAAATACTCCAATTGGCGATGGCCCTGTCCTTTTACCAGACAACCA
TTACCTGTGACACAATCTGTCTTTTCGAAAGATCCCAACGAAAAGCGTGACCACATGGTCCTT
CTTGAGTTTGTAACTGCTGCTGGGATTACACATGGCATGGATGAGCTCTACAAATAAGAATTC
AGGGTTTTCCAGTCACGACGTGGCGCGCTGTAGCTAGTAAAGTTCTAACCCCTGGCGGTCC
CGCCCCCGCCCCCTTTGGGGGGGGCGGGGGGTTTTTTGTTCTCCCGCTAGCCTCCAGGGGCCCTC
TTTCCGCCCCAGCTGCATTAATGAATCGGCCAACGCGCGGGGAGAGGCGGTTTTCGCTATTGG
GCGCTCTTCGCTTCTCGCTCACTGACTCGCTGCGCTCGGTCGTTTCGGCTGCGGCGAGCGGT
ATCAGCTCACTCAAAGGCGGTAATACGGTTATCCACAGAATCAGGGGATAACGCAGGAAAGA
ACATGTGAGCAAAGGCCAGCAAAGGCCAGGAACCGTAAAAAGGCCGCGTTGCTGGCGTT
TTTCCATAGGCTCCGCCCCCTGACGAGCATCACAAAATCGACGCTCAAGTCAGAGGTGGCG
```

AAACCCGACAGGACTATAAAGATAACCAGGCGTTTCCCCCTGGAAGCTCCCTCGTGCGCTCTCC  
TGTTCCGACCCCTGCCGCTTACCGGATACCTGTCCGCCTTTCTCCCTTCGGGAAGCGTGCGCCTT  
TCTCATAGCTCACGCTGTAGGTATCTCAGTTCGGTGTAGGTCGTTTCGCTCCAAGCTGGGCTGT  
GTGCACGAACCCCGTTACGCCGACCGCTGCGCCTTATCCGGTAACTATCGTCTTGAGTCCA  
ACCCGGTAAGACACGACTTATCGCCACTGGCAGCAGCCACTGGTAACAGGATTAGCAGAGCG  
AGGTATGTAGGCGGTGCTACAGAGTTCTTGAAGTGGTGGCCTAACTACGGCTACACTAGAAG  
AACAGTATTTGGTATCTGCGCTCTGCTGAAGCCAGTTACCTTCGGAAAAAGAGTTGGTAGCTC  
TTGATCCGGCAAACAACCACCGCTGGTAGCGGTGGTTTTTTTTGTTTGAAGCAGCAGATTAC  
GCGCAGAAAAAAGGATCTCAAGAAGATCCTTTGATCTTTTTCTACGGGGTCTGACGCTCAGTG  
GAACGAAAACCTCACGTTAAGGGATTTTGGTCATGAGATTATCAAAAAGGATCTTCACCTAGAT  
CCTTTTAAATTAATAAATGAAGTTTTAAATCAATCTAAAGTATATATGAGTAAACTGCGGCCGCT  
TGACGTCAGCGCAGAAGTGGTCAGCTTGCATGCCTGTTGGCATGCCTCAGTTGACCCCATTA  
CCCTTCTCTGGAGGTGGTAGCTAGAGGGGAATGGTCCCACCCTGGAGCCCCACCCCTTGCC  
AACCTGGGCCCGGTATAATGCCGGGCAATGGGAAGACCGGGCCCCCTGGGGGCCAAGGC  
GGCAGGGCCGCGTGAGGACCAAAAAGAGAGGCTCCCGCTGGGAGGGAACCCAAATCCAGC  
AACTTTTTCTTCGCCTAAGTTATCCCCTCCAGCGGGAAAGGCAATAGGCGCCAAGGCGGC  
GCGCGGGGGAGTGCCGTCTCCGACGCGCGAAACGGGAGGGGTTTATGCCCAAGAAGGAGT  
TGAAGGGAAGAGCTATAAAGAACAGCCGGAAGGACTCACCGAGCGGGGCCGGCCTTCCCT  
GAGGCCCTGGCCCGGAGGAAGCGGGCGAGGGGCGAGGAGCTTCCGCCCTCTACCTGAAGC  
TCCTGGAGGGGGCCGCGCCCCCGGAGAAGGGGGTCCATGAGCCCCCGCCGAGGAGGCGCC  
TCCCCGGAGGACCTCCGCCGGAAGCTCCGGGAGGCGCCGCTTCCCCGGCCCTCCCCAACCG  
ACAGGAGCTCTCCGCTCCCCGCCCCCGCCGAGATGAGGCGGGACGCTGGAGCCTCGCCG  
ACCGCCTCTGGAGGAGGGGGAGCGGCGGGGCACCCTGCCAGGGCTTTCGAGCGGGAGCG  
GAGGGTGTACCGACCCTCCTCGCCCTGGGCCTCGAGGTCCTGGCCCGGAGGCTGGGCCCGG  
GGAGGCCCTGCCAGGAACCTGTCCAGGTCTCCTTCTCGCCGTGAACGACGCCCTGGCCG  
TGGCCCTGGGAATCCCCCGCCCTCCCTTACCGGGTCTGGCCTCCCTGGAGGCCAAGGGGC  
TCATCCGCCGGAGGGCCTGGCGCACCCCGGCCACCCTCAAGGGCCGGACGGGGGTCTACGCC  
GGCGGGACCCTCTACGCCGTGCGCCTGCCCCACCGGGAGGCCCGCCCCCGCCTGGACCCGGA  
GGACTTCCGCCACCCTGGCGGGACCTGGAGGGGGACGCCCGTCAGGGGGCGCACCGCCTGG  
AGCTTGAGAGAGTCATATAAAGTCTCCTAAGGAGGACTCCGGGGTCTCCAGCTCCTCCTT  
CGTTTTTCGTTATCCCCTGGCGAAGCCGAAACTCCGTTAGCTTTAGACTCTCTACCGCCCTCC  
TCCGGGCCCGCCCCGCGAGCGCCGGGCCCTGGTGGAGGCCCTCGCCCTCTCCCTGGCCCCG  
GAGTTCGGGATCGCGGGAGCGTGCCTTCTACGCCTGGTCTCTGGAACGCCCTCCGGGC  
CGAGCTCTACGGCCTGATGGAGGGGGCCCTCGAGGCCGTCGCCTGGGCGGTCCGGCGGGCG  
CGGGAGGCCGCGGCCAAGGTCTCTGGAGCCCGAGGGGCGAGGGGGTCCGGCGCCCCGGG  
GCCCTCTCGCCACCTCCTCCGGGAGCGGGGCCCTCTGGAGCTTTCGCCAGGCCCTCAG  
TGCGGGTGGCGTAGGGTCCCGCCGGGCTAAGCTGGAGGTAGCCATCCAGGGCCTCTGG  
GGGGTGGCTTGTGTATCAAGACTGGCTGTTCAAGGACTGCCAGGGGGTGGCGCCTCCGCT  
ACCGCCGGAACGGGGGCGGCTACGAGGCCCTCCGGGACGGTGAGAGGTGGGAGAAGGTCC  
CCTCGGTACGGAGGTTACGGGGCGCCTGAACAAGAACCTTCAGGACTGGGCCGTGCGCCAG  
GTGGTGGAGTACCTCCAGGGGGAGCTGGTCCCGGGGCTGGTCTCACGGAGGAGGAGGTGA  
ACCGCCTCTGGACGGTGCCTCAAAGCCCACCGCCTGGCCGCGCAGAGGGCCGCCGGGCGA  
GGCGCCGACCTCCACGCTGGGCGGAGGCCTACCTCAAAGGGCAAAGGCCTCCCTTCCCCGA  
GGAGGAGCCCCTTCGGGGGATGGCCCTCGCCCTGGCGGACTGGTGGGACGGGAACGGGGG  
CGAGGCCCTGCGCTCCGAGGAGGCGGTCTTCCACCCGGAGCACCGCTACGCCGGGCGGGTG  
GACCTGGTGGCCCGGCTGGGGGGGAGGGTGGTGGTGGTGGACCTGAAGACCTCCCCCGGG  
CCTACCCGGAGCACCTCCTCAGGTGGGGGCCTACCCCTGGCCCTCCGGGCGGAGGGGGTG

GCGGTGGAGGGGGGCTTCGTGCTGGCCCTGAGGGAAGGCTTAGCCTCCAGGAGGTCCCCCT  
 GGAGGAGGCGGCGCAGGCCTTCTGGGGCTCCTGGCCGTCCACCGCTTTCTGAAGGTCCTCG  
 AGGCTACCCCTGAGCACCCGCTTGTACCACACCTTAAGGGCCTCGAGGTCCCAGGCCACCAC  
 CGCCCCGGCTCCCGTCGGGCCGGGATCGATCCCCGGGAGTATAAC

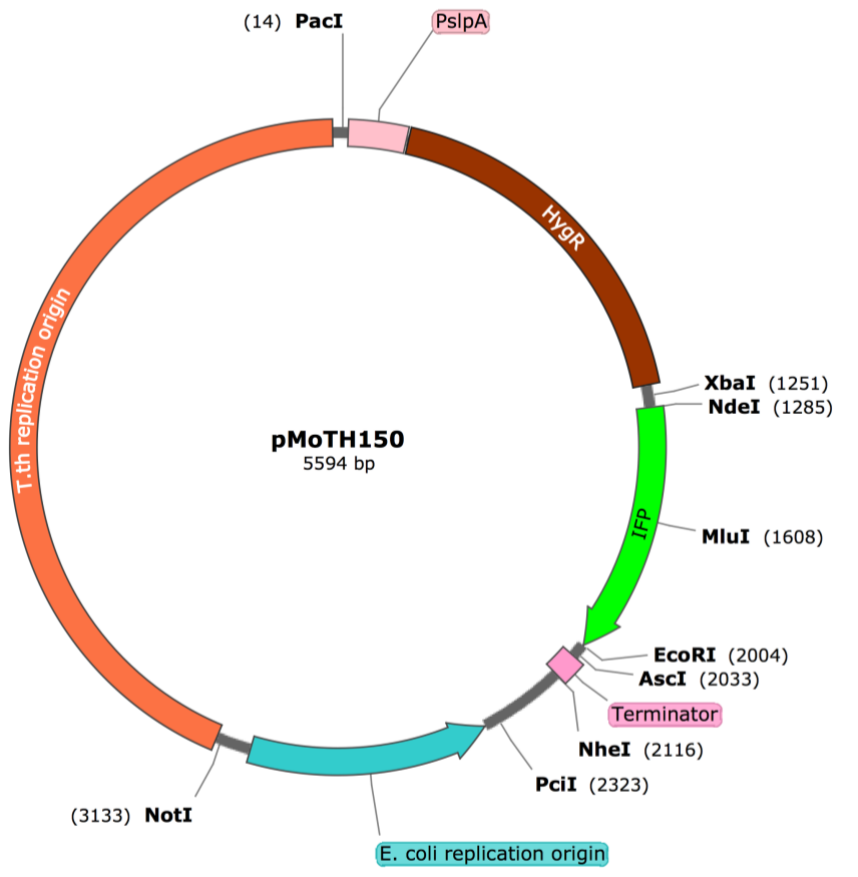

**Scheme S1.** Map of plasmid pMoTH150

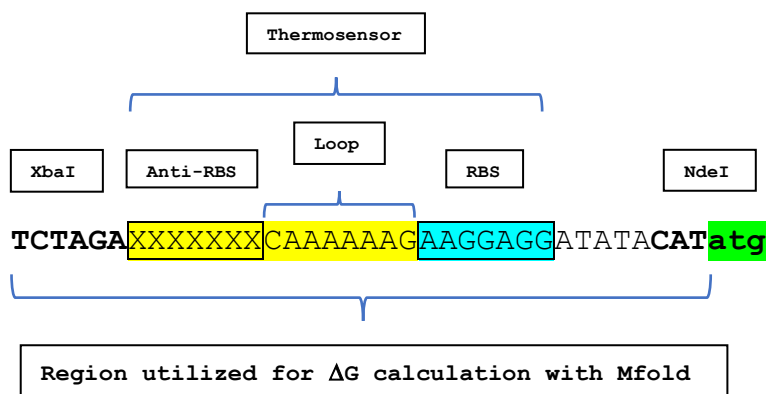

**TS0** ( $\Delta G = -11.10$  kcal/mol)

TCTAGAACTCCTTCAAAAAAGAAGGAGGATATACATatg

**TS10** ( $\Delta G = -12.50$  kcal/mol)

TCTAGACCTCCTTCAAAAAAAAAAAAAAAGAAGGAGGATATACATatg

**TS8** ( $\Delta G = -13.50$  kcal/mol)

TCTAGACCTCCTTAAAGCAAAAAAGCTAAGGAGGATATACATatg

**TSP** ( $\Delta G = -14.20$  kcal/mol)

TCTAGACCTCCTTCAAAAAAGAAGGAGGATATACATatg

**TS1** ( $\Delta G = -16.20$  kcal/mol)

TCTAGACCTCCTTAACA AAAAAGTTAAGGAGGATATACATatg

**TS2** ( $\Delta G = -18.60$  kcal/mol)

TCTAGACCTCCTTAGCAAAAAAGCTAAGGAGGATATACATatg

**TS4** ( $\Delta G = -21.10$  kcal/mol)

TCTAGACCTCCTTACGCAAAAAAGCGTAAGGAGGATATACATatg

**TS6** ( $\Delta G = -26.90$  kcal/mol)

TCTAGACCTCCTTACGCGCAAAAAAGCGCTAAGGAGGATATACATatg

**PA**

TCTAGAAAAAAACAAAAAGAAGGAGGATATACATatg

**DF**

TCTAGAAAGGAGGATATACATatg

**Figure S1.** Scheme of thermosensors. Different regions of the thermosensors are color-coded.  $\Delta G$  values and RNA folding calculations were performed with the Mfold software<sup>19</sup>.

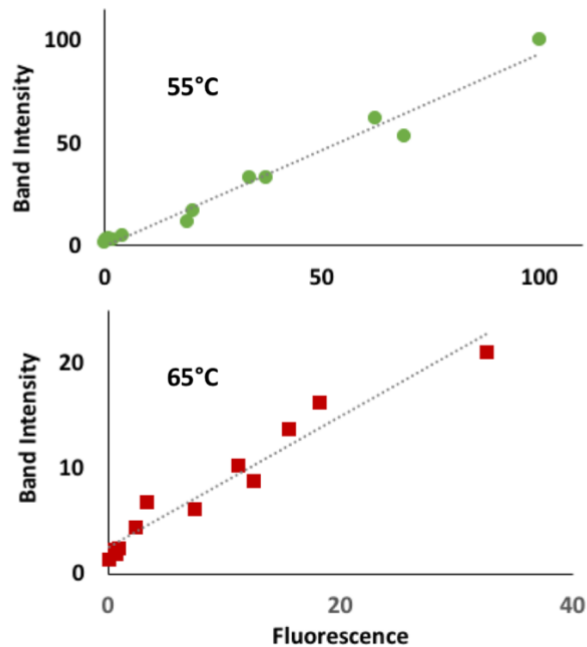

**Figure S2.** Correlation between sIFP fluorescence measurements and Western detection of the band corresponding to sIFP. Experiments performed at 55°C (green circles) and at 65°C (red squares) have been analyzed. The values of fluorescence intensity are those presented in Fig. 4A, quantification of sIFP band intensities as detected by Western blotting are from Fig. 4D. Dotted line represents a linear regression data fit.

## References

1. Swarts, D. C.; Jore, M. M.; Westra, E. R.; Zhu, Y.; Janssen, J. H.; Snijders, A. P.; Wang, Y.; Patel, D. J.; Berenguer, J.; Brouns, S. J. J.; van der Oost, J., DNA-guided DNA interference by a prokaryotic Argonaute. *Nature* **2014**, *507* (7491), 258-261.
2. de Grado, M.; Lasa, I.; Berenguer, J., Characterization of a plasmid replicative origin from an extreme thermophile. *FEMS Microbiol Lett* **1998**, *165* (1), 51-7.
3. Cava, F.; Zafra, O.; Berenguer, J., A cytochrome c containing nitrate reductase plays a role in electron transport for denitrification in *Thermus thermophilus* without involvement of the bc respiratory complex. *Mol Microbiol* **2008**, *70* (2), 507-18.
4. Takayama, G.; Kosuge, T.; Maseda, H.; Nakamura, A.; Hoshino, T., Nucleotide sequence of the cryptic plasmid pTT8 from *Thermus thermophilus* HB8 and isolation and characterization of its high-copy-number mutant. *Plasmid* **2004**, *51* (3), 227-37.
5. Silva-Rocha, R.; Martinez-Garcia, E.; Calles, B.; Chavarria, M.; Arce-Rodriguez, A.; de Las Heras, A.; Paez-Espino, A. D.; Durante-Rodriguez, G.; Kim, J.; Nickel, P. I.; Platero, R.; de Lorenzo, V., The Standard European Vector Architecture (SEVA): a coherent platform for the analysis and deployment of complex prokaryotic phenotypes. *Nucleic acids research* **2013**, *41* (Database issue), D666-75.
6. Hoseki, J.; Yano, T.; Koyama, Y.; Kuramitsu, S.; Kagamiyama, H., Directed evolution of thermostable kanamycin-resistance gene: a convenient selection marker for *Thermus thermophilus*. *J Biochem* **1999**, *126* (5), 951-6.
7. Nakamura, A.; Takakura, Y.; Kobayashi, H.; Hoshino, T., In vivo directed evolution for thermostabilization of *Escherichia coli* hygromycin B phosphotransferase and the use of the gene as a selection marker in the host-vector system of *Thermus thermophilus*. *Journal of bioscience and bioengineering* **2005**, *100* (2), 158-63.
8. Brouns, S. J.; Wu, H.; Akerboom, J.; Turnbull, A. P.; de Vos, W. M.; van der Oost, J., Engineering a selectable marker for hyperthermophiles. *J Biol Chem* **2005**, *280* (12), 11422-31.
9. Cava, F.; Laptenko, O.; Borukhov, S.; Chahlafl, Z.; Blas-Galindo, E.; Gomez-Puertas, P.; Berenguer, J., Control of the respiratory metabolism of *Thermus thermophilus* by the nitrate respiration conjugative element NCE. *Mol Microbiol* **2007**, *64* (3), 630-46.
10. Faraldo, M. L.; de Pedro, M. A.; Berenguer, J., Cloning and expression in *Escherichia coli* of the structural gene coding for the monomeric protein of the S layer of *Thermus thermophilus* HB8. *J Bacteriol* **1991**, *173* (17), 5346-51.
11. Moreno, R.; Zafra, O.; Cava, F.; Berenguer, J., Development of a gene expression vector for *Thermus thermophilus* based on the promoter of the respiratory nitrate reductase. *Plasmid* **2003**, *49* (1), 2-8.
12. Koyama, Y.; Okamoto, S.; Furukawa, K., Cloning of alpha- and beta-galactosidase genes from an extreme thermophile, *Thermus* strain T2, and their



- expression in *Thermus thermophilus* HB27. *Appl Environ Microbiol* **1990**, *56* (7), 2251-4.
13. Fujita, A.; Misumi, Y.; Honda, S.; Sato, T.; Koyama, Y., Construction of new cloning vectors that employ the phytoene synthase encoding gene for color screening of cloned DNA inserts in *Thermus thermophilus*. *Gene* **2013**, *527* (2), 655-62.
  14. Angelini, S.; Moreno, R.; Gouffi, K.; Santini, C.; Yamagishi, A.; Berenguer, J.; Wu, L., Export of *Thermus thermophilus* alkaline phosphatase via the twin-arginine translocation pathway in *Escherichia coli*. *FEBS Lett* **2001**, *506* (2), 103-7.
  15. Pedelacq, J. D.; Cabantous, S.; Tran, T.; Terwilliger, T. C.; Waldo, G. S., Engineering and characterization of a superfolder green fluorescent protein. *Nat Biotechnol* **2006**, *24* (1), 79-88.
  16. Nagai, T.; Ibata, K.; Park, E. S.; Kubota, M.; Mikoshiba, K.; Miyawaki, A., A variant of yellow fluorescent protein with fast and efficient maturation for cell-biological applications. *Nat Biotechnol* **2002**, *20* (1), 87-90.
  17. Inoue, H.; Nojima, H.; Okayama, H., High efficiency transformation of *Escherichia coli* with plasmids. *Gene* **1990**, *96* (1), 23-8.
  18. Koyama, Y.; Hoshino, T.; Tomizuka, N.; Furukawa, K., Genetic transformation of the extreme thermophile *Thermus thermophilus* and of other *Thermus* spp. *J Bacteriol* **1986**, *166* (1), 338-40.
  19. Zuker, M., Mfold web server for nucleic acid folding and hybridization prediction. *Nucleic acids research* **2003**, *31* (13), 3406-15.
